# Supplementary material for: Elevated Levels of Urinary Markers of Oxidative DNA and RNA Damage in Type 2 Diabetes with Complications
Source: PubMed Central journal article supplement (PMC4685146; doi:10.1155/2016/4323198), 2015-12-07
Supplement: 4323198.f1.pdf [file 4323198.f1.pdf]

**Supplementary table 1 HPLC conditions for analytes**

| Analytes                           | Elute condition                                                                                | Injection volume | Run time |
|------------------------------------|------------------------------------------------------------------------------------------------|------------------|----------|
| 8-oxodGuo and 8-oxoGuo<br>in urine | 0-1.8 min: 5% B, 0.3ml/min;<br>1.8-2.0 min: 20% B, 0.3ml/min;<br>2.0-3.0 min: 5% B, 0.3ml/min. | 2 $\mu$ l        | 3 min    |

**Supplementary table 2 Effects of variables on urinary 8-oxodGuo and 8-oxoGuo by ordinal regression**

| Oxidation markers | Variables | OR (95% CI)      | p      |
|-------------------|-----------|------------------|--------|
| <b>8-oxodGuo</b>  |           |                  |        |
| All               | Age       | 1.03 (1.02-1.04) | <0.001 |
| Healthy controls  | Age       | 1.05 (1.04-1.06) | <0.001 |
| <b>8-oxoGuo</b>   |           |                  |        |
| All               | Age       | 1.07 (1.06-1.08) | <0.001 |
|                   | Glucose   | 1.12 (1.08-1.17) | <0.001 |
| Healthy controls  | Age       | 1.09 (1.07-1.10) | <0.001 |
| Type 2 diabetes   | Age       | 1.05 (1.03-1.06) | <0.001 |
|                   | Glucose   | 1.07 (1.01-1.12) | 0.013  |

OR, odds ratio; CI, confidence interval.

8-oxodGuo and 8-oxoGuo are categorized into four groups according to their quartiles respectively.

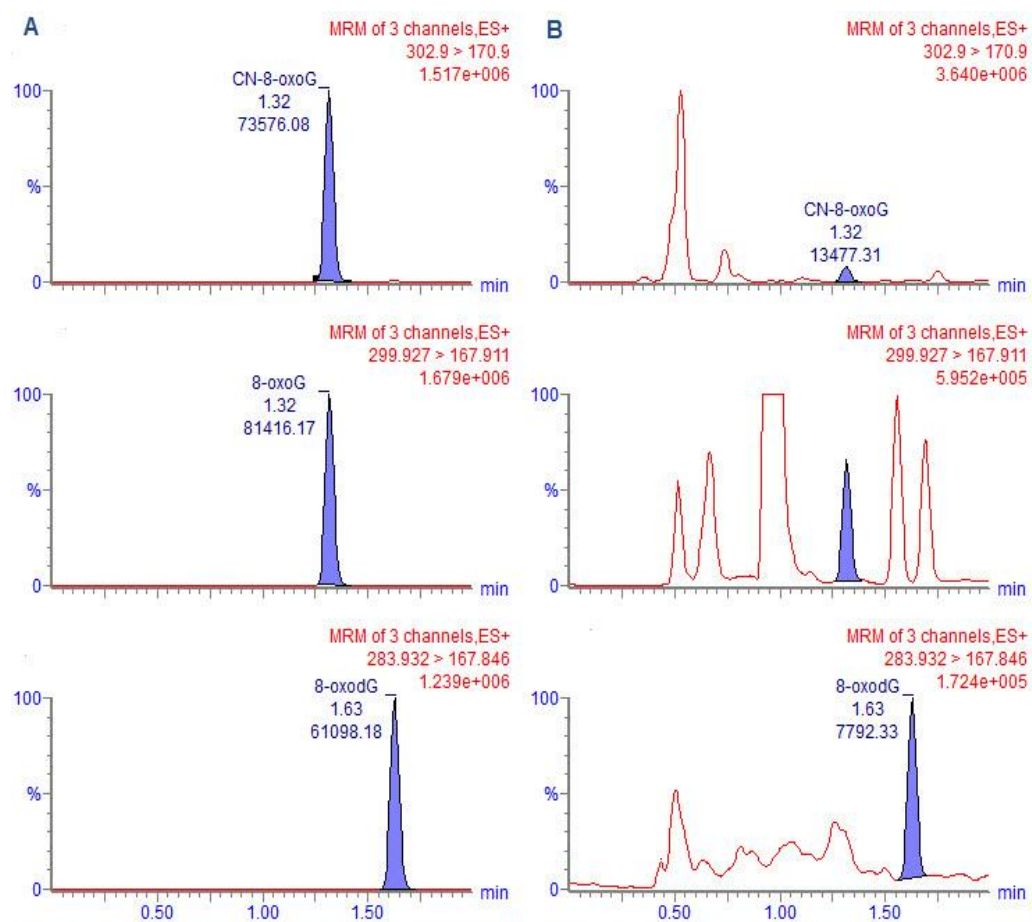

**Supplementary figure 1 UPLC-MS/MS chromatograms.** (A) Standard of CN-8-oxoG, 8-oxoGuo and 8-oxodGuo. (B) Human urine sample. CN-8-oxoG: [ $^{15}\text{N}_2^{13}\text{C}_1$ ]8-oxoGuo, the internal standard for 8-oxoGuo. 8-oxodGuo and 8-oxoGuo were eluted at 1.63 and 1.32 minutes respectively.

A.

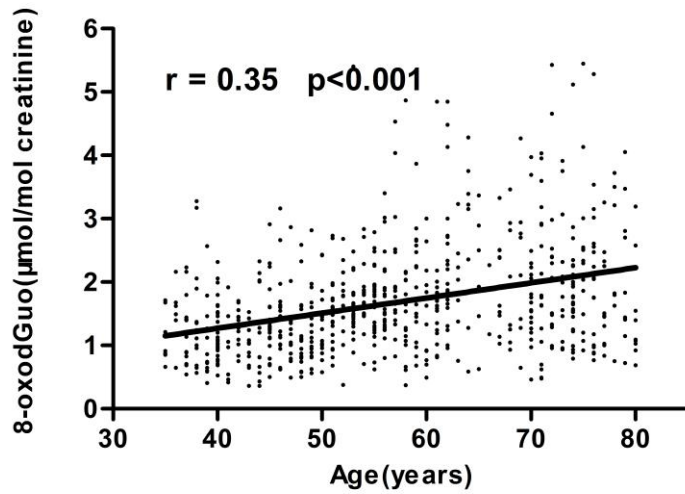

B.

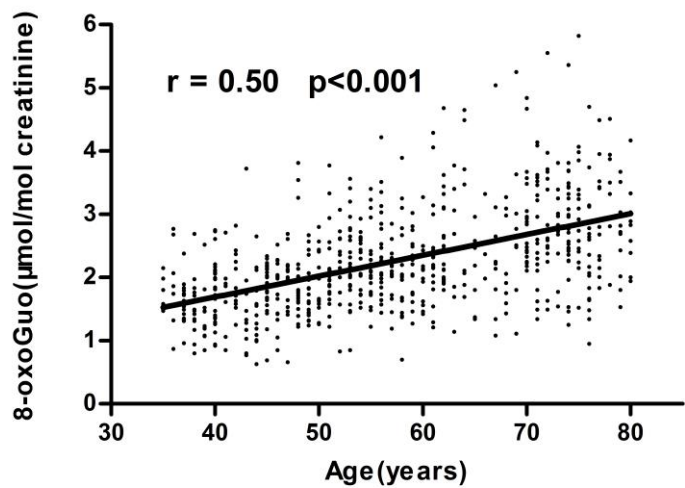

**Supplementary figure 2 Correlation of nucleic acid oxidation with age in healthy controls.** (A) Correlation of urinary 8-oxodGuo ( $\mu\text{mol/mol}$  creatinine) levels with age in healthy controls ( $r=0.35$ ,  $p<0.001$ ,  $n=683$ ). (B) Correlation of urinary 8-oxoGuo ( $\mu\text{mol/mol}$  creatinine) levels with age in healthy controls ( $r=0.50$ ,  $p<0.001$ ,  $n=683$ ).

A.

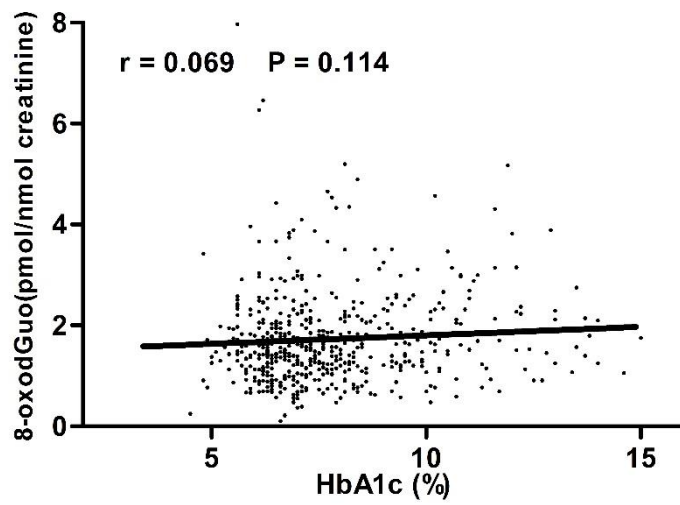

B.

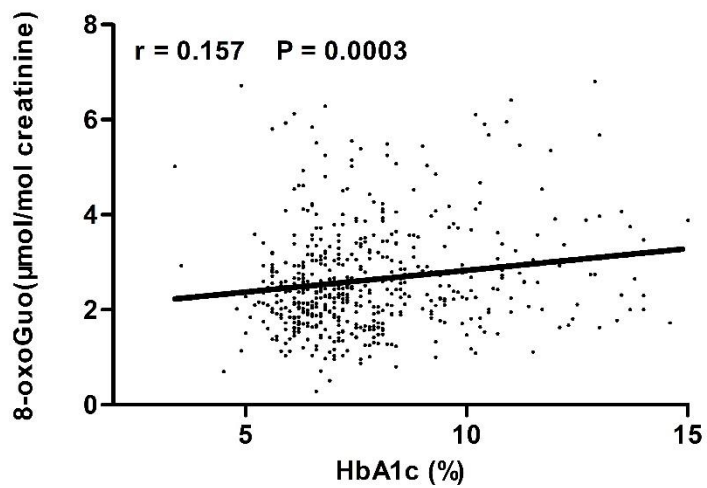

**Supplementary figure 3 Correlations between urinary biomarkers and HbA1c in patients with type 2 diabetes. (A) Between 8-oxodGuo and HbA1c. (B) Between 8-oxoGuo and HbA1c.**

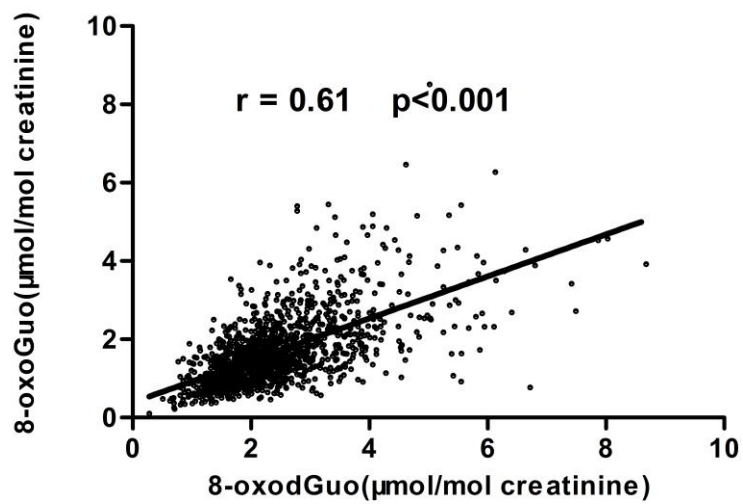

**Supplementary figure 4 Correlation of urinary 8-oxodGuo with 8-oxoGuo.**

Urinary levels of 8-oxodGuo and 8-oxoGuo in all the healthy controls and diabetes patients from 31 to 80 years ( $r=0.61$ ,  $p<0.001$ ,  $n=1316$ ).
